# Supplementary material
Source: PubMed Central journal article supplement (PMC7375740)
Supplement: DS_10.1177_0022034520916151.pdf [file DS_10.1177_0022034520916151.pdf]

## Flossing Is Associated with Improved Oral Health in Older Adults

J.T. Marchesan, K.M. Byrd, K. Moss, J.S. Preisser, T. Morelli, A.F. Zandona, Y. Jiao, and J. Beck

### Appendix

**Appendix Table 1:** Demographics by Study Follow Up Status (N=686)

|                          | Lost to follow up* | Five-year complete** | p-value |
|--------------------------|--------------------|----------------------|---------|
| n                        | 311                | 375                  |         |
| Mean Age (SD)            | 74.3 (6.4)         | 72.3 (4.8)           | <0.0001 |
| African American         | 176 (56.6%)        | 203 (54.1%)          | 0.52    |
| Caucasian                | 135 (43.4%)        | 172 (45.9%)          |         |
| Female                   | 168 (54.0%)        | 232 (61.9%)          | 0.04    |
| Male                     | 143 (46.0%)        | 143 (38.1%)          |         |
| Diabetics                | 56 (18.0%)         | 63 (16.8%)           | 0.66    |
| Non-Diabetic             | 254 (81.7%)        | 312 (83.2%)          |         |
| Smoker                   | 68 (21.9%)         | 66 (17.6%)           | 0.16    |
| Non-Smoker               | 243 (78.1%)        | 309 (82.4%)          |         |
| Education (Basic)        | 255 (82.0%)        | 279 (74.4%)          | 0.9     |
| Intermediate             | 34 (10.9%)         | 39 (10.4%)           |         |
| Advanced                 | 50 (16.1%)         | 57 (15.2%)           |         |
| Episodic DDS Utilization | 99 (31.8%)         | 162 (43.2%)          | 0.002   |
| Regular DDS Utilization  | 206 (66.2%)        | 205 (54.7%)          |         |

\*Individuals that completed visit 1 but did not complete visit 5 (5-year follow-up)

\*\* Individuals that completed visit 1 and visit 5 (5-year follow-up)

**Appendix Table 2:** Outcome of lost to follow up (n=311)

| Subject outcome                                      | Individuals, n (%) |
|------------------------------------------------------|--------------------|
| Died                                                 | 121 (38.9%)        |
| Refusals                                             | 99 (31.8%)         |
| Too ill to participate/Could not contact/ Moved away | 91 (29.3%)         |
